# Supplementary material for: Predicting central cervical lymph node metastasis in papillary thyroid carcinoma with Hashimoto’s thyroiditis: a practical nomogram based on retrospective study
Source: PeerJ. 2024 Apr 19;12:e17108. doi: 10.7717/peerj.17108 (PMC11034492; doi:10.7717/peerj.17108)
Supplement: Supplemental Information 3 — Ultrasonographic data from 376 cases were collected, with patient identities anonymized. [file peerj-12-17108-s003.xlsx]

## Sheet: Sheet1
Sex	Age	Composition	Echogenicity	Margin	Echogenic Foci	Blood Flow	Shape	LNM	CLNM	LLNM	TR
female	36	Solid or almost solid	Hypoechoic	Smooth	Punctate echogenic foci	0	Taller-than-wide	Yes	Yes	None	5
female	51	Solid or almost solid	Hypoechoic	Smooth	None	0	Wider-than-tall	Yes	Yes	None	4
female	52	Solid or almost solid	Hypoechoic	Smooth	Punctate echogenic foci	3	Wider-than-tall	Yes	Yes	None	5
female	42	Solid or almost solid	Hypoechoic	ill-defined	None	0	Taller-than-wide	Yes	Yes	None	5
female	27	Solid or almost solid	Hypoechoic	Smooth	Punctate echogenic foci	0	Wider-than-tall	Yes	None	Yes	5
female	47	Solid or almost solid	very hypoechoic	Smooth	None	1	Wider-than-tall	Yes	Yes	None	4
male	59	Solid or almost solid	Hypoechoic	Lobulated	Macrocalcification	1	Wider-than-tall	Yes	Yes	Yes	4
female	29	Mixed cystic and solid	Hyperechoic	Lobulated	Punctate echogenic foci	1	Taller-than-wide	Yes	Yes	None	5
female	32	Solid or almost solid	Hypoechoic	irregular	None	1	Wider-than-tall	Yes	None	Yes	5
female	50	Solid or almost solid	Hypoechoic	irregular	None	1	Wider-than-tall	Yes	Yes	None	5
female	41	Solid or almost solid	Hypoechoic	Smooth	None	0	Taller-than-wide	Yes	Yes	None	5
female	46	Solid or almost solid	Hyperechoic	Smooth	peripheral calcification	1	Wider-than-tall	Yes	Yes	None	5
female	34	Solid or almost solid	Hypoechoic	Extra-thyroidal extension	Punctate echogenic foci	1	Taller-than-wide	Yes	Yes	None	3
female	24	Solid or almost solid	Hypoechoic	Smooth	Punctate echogenic foci	1	Wider-than-tall	Yes	Yes	None	5
female	28	Solid or almost solid	Hypoechoic	irregular	Punctate echogenic foci	1	Taller-than-wide	Yes	Yes	None	5
female	41	Solid or almost solid	Hypoechoic	irregular	Punctate echogenic foci	0	Wider-than-tall	Yes	Yes	Yes	4
female	34	Solid or almost solid	Hypoechoic	irregular	Punctate echogenic foci	0	Wider-than-tall	Yes	Yes	None	5
female	47	Solid or almost solid	Hypoechoic	Smooth	Punctate echogenic foci	0	Wider-than-tall	Yes	Yes	Yes	3
female	81	Solid or almost solid	Hyperechoic	ill-defined	Punctate echogenic foci	0	Taller-than-wide	Yes	Yes	None	5
female	37	Solid or almost solid	Hypoechoic	Extra-thyroidal extension	Punctate echogenic foci	0	Wider-than-tall	Yes	Yes	None	5
female	47	Solid or almost solid	Hypoechoic	Lobulated	Punctate echogenic foci	0	Wider-than-tall	Yes	Yes	Yes	5
female	44	Solid or almost solid	Hypoechoic	Smooth	Punctate echogenic foci	0	Wider-than-tall	Yes	Yes	None	5
female	38	Solid or almost solid	Hypoechoic	Lobulated	Punctate echogenic foci	0	Wider-than-tall	Yes	None	Yes	5
female	31	Solid or almost solid	Hypoechoic	Smooth	Punctate echogenic foci	0	Wider-than-tall	Yes	Yes	None	5
female	53	Solid or almost solid	Hypoechoic	Lobulated	Punctate echogenic foci	2	Wider-than-tall	Yes	Yes	None	5
female	44	Solid or almost solid	Hypoechoic	irregular	Punctate echogenic foci	0	Wider-than-tall	Yes	Yes	None	3
female	47	Solid or almost solid	Hypoechoic	Extra-thyroidal extension	Punctate echogenic foci	0	Wider-than-tall	Yes	Yes	None	4
female	31	Solid or almost solid	Hypoechoic	Extra-thyroidal extension	Punctate echogenic foci	0	Wider-than-tall	Yes	Yes	Yes	4
female	40	Solid or almost solid	Hypoechoic	ill-defined	None	1	Wider-than-tall	Yes	Yes	None	4
female	32	Solid or almost solid	Hypoechoic	irregular	None	0	Wider-than-tall	Yes	Yes	Yes	5
female	14	Solid or almost solid	Hypoechoic	Smooth	Punctate echogenic foci	1	Wider-than-tall	Yes	Yes	None	4
male	54	Solid or almost solid	Hypoechoic	Smooth	Punctate echogenic foci	1	Taller-than-wide	Yes	Yes	None	4
male	18	Solid or almost solid	Hypoechoic	Smooth	Punctate echogenic foci	1	Wider-than-tall	Yes	Yes	Yes	4
female	64	Solid or almost solid	Hypoechoic	Smooth	Punctate echogenic foci	1	Wider-than-tall	Yes	Yes	None	4
female	26	Solid or almost solid	Hypoechoic	Smooth	Punctate echogenic foci	0	Wider-than-tall	Yes	Yes	None	5
female	40	Solid or almost solid	very hypoechoic	Smooth	None	0	Wider-than-tall	None	None	None	4
female	33	Solid or almost solid	Hypoechoic	ill-defined	None	0	Taller-than-wide	None	None	None	5
female	58	Solid or almost solid	Hypoechoic	Extra-thyroidal extension	None	0	Taller-than-wide	None	None	None	4
female	29	Solid or almost solid	Hypoechoic	Smooth	Punctate echogenic foci	1	Taller-than-wide	None	None	None	5
female	56	Solid or almost solid	Hypoechoic	irregular	Punctate echogenic foci	1	Wider-than-tall	None	None	None	4
female	38	Solid or almost solid	Hypoechoic	Lobulated	Macrocalcification	1	Wider-than-tall	None	None	None	4
female	46	Solid or almost solid	Hypoechoic	Smooth	None	1	Wider-than-tall	None	None	None	4
female	41	Solid or almost solid	Hypoechoic	irregular	None	1	Taller-than-wide	None	None	None	5
female	52	Solid or almost solid	Hypoechoic	irregular	Punctate echogenic foci	1	Taller-than-wide	None	None	None	5
female	29	Solid or almost solid	Hypoechoic	Smooth	Macrocalcification	1	Wider-than-tall	None	None	None	4
female	52	Solid or almost solid	Hypoechoic	Smooth	Punctate echogenic foci	1	Wider-than-tall	None	None	None	5
female	22	Solid or almost solid	Hypoechoic	Lobulated	Punctate echogenic foci	1	Wider-than-tall	None	None	None	5
male	40	Solid or almost solid	Hypoechoic	Extra-thyroidal extension	None	1	Wider-than-tall	None	None	None	4
female	56	Solid or almost solid	Hypoechoic	Extra-thyroidal extension	Punctate echogenic foci	0	Wider-than-tall	None	None	None	5
female	57	Solid or almost solid	Hypoechoic	Smooth	Punctate echogenic foci	1	Taller-than-wide	None	None	None	5
female	47	Solid or almost solid	Hypoechoic	irregular	None	1	Wider-than-tall	None	None	None	4
female	31	Solid or almost solid	Hypoechoic	ill-defined	Punctate echogenic foci	0	Wider-than-tall	None	None	None	5
male	62	Solid or almost solid	Hypoechoic	Smooth	None	0	Taller-than-wide	None	None	None	5
female	31	Solid or almost solid	Hypoechoic	Smooth	None	2	Wider-than-tall	None	None	None	4
female	34	Solid or almost solid	Hypoechoic	Smooth	Punctate echogenic foci	2	Taller-than-wide	None	None	None	5
female	57	Solid or almost solid	Hypoechoic	Smooth	Punctate echogenic foci	2	Taller-than-wide	None	None	None	5
female	52	Solid or almost solid	Hypoechoic	Smooth	Punctate echogenic foci	2	Wider-than-tall	None	None	None	5
female	38	Solid or almost solid	Hypoechoic	Smooth	Punctate echogenic foci	2	Wider-than-tall	None	None	None	5
female	45	Solid or almost solid	Hypoechoic	Lobulated	None	2	Wider-than-tall	None	None	None	4
female	56	Solid or almost solid	Hypoechoic	Lobulated	None	2	Taller-than-wide	None	None	None	5
female	35	Solid or almost solid	Hypoechoic	ill-defined	None	2	Wider-than-tall	None	None	None	4
female	43	Solid or almost solid	Hypoechoic	ill-defined	Punctate echogenic foci	2	Wider-than-tall	None	None	None	5
female	60	Solid or almost solid	Hypoechoic	irregular	None	2	Wider-than-tall	None	None	None	5
female	49	Solid or almost solid	very hypoechoic	Smooth	Punctate echogenic foci	2	Wider-than-tall	None	None	None	5
female	47	Solid or almost solid	very hypoechoic	Lobulated	Punctate echogenic foci	2	Taller-than-wide	None	None	None	5
female	51	Solid or almost solid	Hypoechoic	irregular	Punctate echogenic foci	2	Wider-than-tall	None	None	None	5
female	50	Solid or almost solid	Hypoechoic	irregular	Punctate echogenic foci	2	Wider-than-tall	None	None	None	5
female	42	Solid or almost solid	isoechoic	Extra-thyroidal extension	Punctate echogenic foci	0	Wider-than-tall	None	None	None	5
female	62	Solid or almost solid	isoechoic	Smooth	Punctate echogenic foci	0	Wider-than-tall	None	None	None	4
female	47	Solid or almost solid	Hypoechoic	irregular	None	1	Wider-than-tall	None	None	None	4
male	47	Solid or almost solid	Hypoechoic	Smooth	Punctate echogenic foci	1	Taller-than-wide	None	None	None	5
female	55	Solid or almost solid	Hypoechoic	Smooth	Macrocalcification	1	Wider-than-tall	None	None	None	4
female	55	Solid or almost solid	Hypoechoic	Smooth	Punctate echogenic foci	1	Wider-than-tall	None	None	None	5
female	50	Solid or almost solid	Hypoechoic	Smooth	Punctate echogenic foci	1	Wider-than-tall	None	None	None	5
female	55	Solid or almost solid	Hypoechoic	ill-defined	Punctate echogenic foci	1	Wider-than-tall	None	None	None	5
female	59	Solid or almost solid	Hypoechoic	irregular	Macrocalcification	1	Wider-than-tall	None	None	None	4
female	53	Solid or almost solid	Hypoechoic	ill-defined	None	1	Taller-than-wide	None	None	None	5
female	63	Solid or almost solid	Hypoechoic	Extra-thyroidal extension	Punctate echogenic foci	1	Wider-than-tall	None	None	None	5
male	74	Solid or almost solid	Hypoechoic	Smooth	None	1	Wider-than-tall	None	None	None	4
female	58	Solid or almost solid	Hypoechoic	Extra-thyroidal extension	None	1	Taller-than-wide	None	None	None	5
female	57	Solid or almost solid	Hypoechoic	Smooth	None	1	Wider-than-tall	None	None	None	4
female	44	Solid or almost solid	Hypoechoic	irregular	None	1	Wider-than-tall	None	None	None	5
female	67	Solid or almost solid	Hypoechoic	Smooth	None	1	Taller-than-wide	None	None	None	5
female	45	Solid or almost solid	very hypoechoic	irregular	None	1	Wider-than-tall	None	None	None	4
female	50	Solid or almost solid	very hypoechoic	Smooth	None	1	Taller-than-wide	None	None	None	5
female	49	Solid or almost solid	very hypoechoic	irregular	None	0	Wider-than-tall	None	None	None	4
female	58	Solid or almost solid	Hyperechoic	Smooth	None	3	Wider-than-tall	None	None	None	3
female	50	Solid or almost solid	Hypoechoic	Lobulated	Punctate echogenic foci	1	Taller-than-wide	Yes	Yes	None	5
female	46	Solid or almost solid	Hypoechoic	Lobulated	Punctate echogenic foci	0	Wider-than-tall	Yes	Yes	None	5
female	46	Solid or almost solid	Hypoechoic	Smooth	Punctate echogenic foci	0	Wider-than-tall	Yes	Yes	None	5
male	33	Solid or almost solid	Hypoechoic	irregular	Punctate echogenic foci	1	Wider-than-tall	Yes	Yes	Yes	5
male	47	Solid or almost solid	Hypoechoic	Lobulated	Punctate echogenic foci	1	Taller-than-wide	Yes	Yes	Yes	5
female	51	Solid or almost solid	Hypoechoic	Extra-thyroidal extension	Punctate echogenic foci	1	Wider-than-tall	Yes	Yes	None	5
female	37	Solid or almost solid	Hypoechoic	ill-defined	Punctate echogenic foci	1	Wider-than-tall	Yes	Yes	None	5
female	45	Solid or almost solid	Hypoechoic	Extra-thyroidal extension	Punctate echogenic foci	0	Wider-than-tall	Yes	Yes	None	5
female	40	Solid or almost solid	Hypoechoic	Smooth	Punctate echogenic foci	0	Wider-than-tall	Yes	Yes	None	5
female	44	Solid or almost solid	Hypoechoic	Smooth	Punctate echogenic foci	0	Wider-than-tall	Yes	Yes	Yes	5
female	14	Solid or almost solid	isoechoic	irregular	Punctate echogenic foci	0	Wider-than-tall	Yes	Yes	Yes	5
female	22	Solid or almost solid	Hypoechoic	Smooth	Punctate echogenic foci	0	Taller-than-wide	Yes	Yes	Yes	5
female	31	Solid or almost solid	Hypoechoic	irregular	Punctate echogenic foci	0	Wider-than-tall	Yes	Yes	None	5
female	47	Solid or almost solid	Hypoechoic	Smooth	Punctate echogenic foci	0	Taller-than-wide	Yes	Yes	None	5
female	34	Solid or almost solid	Hypoechoic	irregular	None	0	Taller-than-wide	Yes	Yes	None	5
female	58	Solid or almost solid	Hypoechoic	Smooth	Punctate echogenic foci	0	Wider-than-tall	Yes	Yes	None	5
female	29	Solid or almost solid	Hypoechoic	ill-defined	Macrocalcification	0	Wider-than-tall	Yes	Yes	None	4
female	40	Solid or almost solid	Hypoechoic	Lobulated	None	0	Taller-than-wide	Yes	Yes	Yes	5
male	27	Solid or almost solid	Hypoechoic	Lobulated	Punctate echogenic foci	0	Wider-than-tall	Yes	Yes	None	5
female	59	Solid or almost solid	Hypoechoic	Lobulated	Punctate echogenic foci	0	Wider-than-tall	Yes	Yes	Yes	5
male	26	Solid or almost solid	Hypoechoic	Smooth	Punctate echogenic foci	0	Wider-than-tall	Yes	Yes	None	5
female	31	Solid or almost solid	Hypoechoic	Smooth	None	0	Wider-than-tall	Yes	Yes	None	4
female	47	Solid or almost solid	Hypoechoic	Smooth	Punctate echogenic foci	0	Wider-than-tall	Yes	Yes	None	5
female	28	Solid or almost solid	Hypoechoic	Smooth	Punctate echogenic foci	0	Wider-than-tall	Yes	Yes	None	5
male	41	Solid or almost solid	Hypoechoic	Smooth	Punctate echogenic foci	0	Taller-than-wide	Yes	Yes	None	5
female	56	Solid or almost solid	Hypoechoic	Smooth	Punctate echogenic foci	0	Wider-than-tall	None	None	None	5
female	52	Solid or almost solid	Hypoechoic	Extra-thyroidal extension	None	1	Taller-than-wide	None	None	None	5
female	56	Solid or almost solid	Hypoechoic	ill-defined	Punctate echogenic foci	1	Wider-than-tall	None	None	None	5
female	50	Solid or almost solid	Hypoechoic	irregular	None	1	Wider-than-tall	None	None	None	4
female	51	Solid or almost solid	Hypoechoic	irregular	Macrocalcification	1	Taller-than-wide	None	None	None	5
female	36	Solid or almost solid	Hypoechoic	Lobulated	Punctate echogenic foci	1	Wider-than-tall	None	None	None	5
male	45	Solid or almost solid	Hypoechoic	irregular	Punctate echogenic foci	1	Wider-than-tall	None	None	None	5
female	37	Solid or almost solid	Hypoechoic	Smooth	Punctate echogenic foci	1	Wider-than-tall	None	None	None	5
female	34	Solid or almost solid	Hypoechoic	Smooth	None	1	Taller-than-wide	None	None	None	5
female	53	Solid or almost solid	Hypoechoic	Smooth	Punctate echogenic foci	1	Wider-than-tall	None	None	None	5
female	48	Solid or almost solid	Hypoechoic	Lobulated	Punctate echogenic foci	1	Wider-than-tall	None	None	None	5
male	28	Solid or almost solid	Hypoechoic	irregular	Punctate echogenic foci	1	Wider-than-tall	None	None	None	5
female	48	Solid or almost solid	Hypoechoic	Smooth	Punctate echogenic foci	1	Taller-than-wide	None	None	None	5
female	57	Solid or almost solid	Hypoechoic	Lobulated	None	3	Taller-than-wide	None	None	None	5
female	37	Solid or almost solid	Hypoechoic	Smooth	Punctate echogenic foci	1	Wider-than-tall	None	None	None	5
female	59	Solid or almost solid	Hypoechoic	Lobulated	Punctate echogenic foci	1	Wider-than-tall	None	None	None	5
male	25	Solid or almost solid	Hypoechoic	Smooth	Punctate echogenic foci	1	Wider-than-tall	None	None	None	5
female	43	Solid or almost solid	very hypoechoic	ill-defined	Punctate echogenic foci	1	Taller-than-wide	None	None	None	5
male	62	Solid or almost solid	Hypoechoic	irregular	Punctate echogenic foci	1	Taller-than-wide	None	None	None	5
male	42	Solid or almost solid	Hyperechoic	Lobulated	None	1	Wider-than-tall	None	None	None	4
female	49	Solid or almost solid	very hypoechoic	irregular	peripheral calcification	1	Wider-than-tall	Yes	Yes	None	4
female	39	Solid or almost solid	Hypoechoic	Lobulated	None	1	Taller-than-wide	Yes	Yes	Yes	5
female	35	Solid or almost solid	Hypoechoic	Smooth	Punctate echogenic foci	1	Wider-than-tall	Yes	Yes	None	5
female	41	Solid or almost solid	Hypoechoic	irregular	Macrocalcification	1	Wider-than-tall	Yes	Yes	None	5
female	57	Solid or almost solid	Hypoechoic	irregular	None	1	Wider-than-tall	None	None	None	5
female	37	Solid or almost solid	Hypoechoic	Extra-thyroidal extension	peripheral calcification	0	Wider-than-tall	None	None	None	4
female	60	Solid or almost solid	Hypoechoic	Lobulated	Punctate echogenic foci	1	Taller-than-wide	Yes	Yes	Yes	5
male	44	Solid or almost solid	Hypoechoic	irregular	Punctate echogenic foci	1	Wider-than-tall	None	None	None	5
female	49	Solid or almost solid	Hypoechoic	Lobulated	None	0	Taller-than-wide	Yes	Yes	None	5
female	39	Solid or almost solid	Hypoechoic	Smooth	Punctate echogenic foci	1	Taller-than-wide	None	None	None	5
female	34	Solid or almost solid	Hypoechoic	Lobulated	None	1	Wider-than-tall	Yes	Yes	None	4
female	31	Solid or almost solid	Hypoechoic	Extra-thyroidal extension	Punctate echogenic foci	1	Taller-than-wide	Yes	Yes	None	5
female	57	Solid or almost solid	Hypoechoic	Smooth	None	1	Wider-than-tall	None	None	None	4
female	58	Solid or almost solid	Hypoechoic	Smooth	Punctate echogenic foci	1	Wider-than-tall	None	None	None	5
female	37	Solid or almost solid	Hypoechoic	Lobulated	Punctate echogenic foci	1	Taller-than-wide	Yes	Yes	Yes	5
female	41	Solid or almost solid	Hypoechoic	Smooth	Punctate echogenic foci	1	Wider-than-tall	Yes	Yes	None	5
female	46	Solid or almost solid	Hypoechoic	Smooth	Punctate echogenic foci	1	Wider-than-tall	Yes	Yes	None	5
female	33	Solid or almost solid	Hypoechoic	Smooth	None	1	Wider-than-tall	None	None	None	4
male	69	Solid or almost solid	very hypoechoic	irregular	Punctate echogenic foci	0	Taller-than-wide	None	None	None	5
female	53	Solid or almost solid	Hypoechoic	irregular	None	0	Taller-than-wide	None	None	None	5
female	48	Solid or almost solid	Hypoechoic	irregular	Punctate echogenic foci	0	Taller-than-wide	Yes	Yes	Yes	5
female	30	Solid or almost solid	Hypoechoic	Lobulated	Punctate echogenic foci	0	Wider-than-tall	Yes	Yes	None	5
female	51	Solid or almost solid	Hypoechoic	Extra-thyroidal extension	Punctate echogenic foci	0	Taller-than-wide	Yes	Yes	None	5
female	29	Solid or almost solid	Hypoechoic	Lobulated	Punctate echogenic foci	0	Taller-than-wide	Yes	Yes	Yes	5
female	51	Solid or almost solid	Hypoechoic	irregular	Punctate echogenic foci	0	Taller-than-wide	None	None	None	5
female	47	Solid or almost solid	Hypoechoic	Smooth	None	0	Taller-than-wide	None	None	None	5
female	34	Solid or almost solid	Hypoechoic	irregular	Punctate echogenic foci	0	Taller-than-wide	Yes	Yes	None	5
female	46	Solid or almost solid	Hypoechoic	irregular	Punctate echogenic foci	0	Taller-than-wide	Yes	Yes	None	5
female	40	Solid or almost solid	Hypoechoic	Lobulated	Punctate echogenic foci	0	Taller-than-wide	Yes	Yes	None	5
female	44	Solid or almost solid	Hypoechoic	irregular	Punctate echogenic foci	0	Taller-than-wide	Yes	Yes	None	5
female	47	Solid or almost solid	Hypoechoic	Lobulated	Punctate echogenic foci	0	Wider-than-tall	None	None	None	5
female	52	Solid or almost solid	Hypoechoic	Extra-thyroidal extension	Punctate echogenic foci	0	Taller-than-wide	None	None	None	5
female	54	Solid or almost solid	Hypoechoic	Lobulated	Punctate echogenic foci	0	Taller-than-wide	None	None	None	5
female	43	Solid or almost solid	Hypoechoic	Smooth	None	0	Taller-than-wide	Yes	Yes	None	5
female	34	Solid or almost solid	Hypoechoic	Lobulated	Punctate echogenic foci	0	Taller-than-wide	Yes	Yes	None	5
male	53	Solid or almost solid	Hypoechoic	irregular	Punctate echogenic foci	0	Taller-than-wide	None	None	None	5
female	50	Solid or almost solid	Hypoechoic	Smooth	Punctate echogenic foci	0	Taller-than-wide	None	None	None	5
female	46	Solid or almost solid	Hypoechoic	Lobulated	Punctate echogenic foci	1	Wider-than-tall	Yes	Yes	Yes	5
female	49	Solid or almost solid	Hypoechoic	Lobulated	Punctate echogenic foci	1	Taller-than-wide	Yes	Yes	None	5
female	53	Solid or almost solid	Hypoechoic	irregular	None	1	Taller-than-wide	None	None	None	5
female	44	Solid or almost solid	Hypoechoic	Smooth	Punctate echogenic foci	1	Taller-than-wide	None	None	None	5
female	51	Solid or almost solid	Hypoechoic	irregular	None	1	Taller-than-wide	None	None	None	5
female	62	Solid or almost solid	Hypoechoic	Extra-thyroidal extension	Punctate echogenic foci	1	Taller-than-wide	None	None	None	5
female	32	Solid or almost solid	Hypoechoic	irregular	Punctate echogenic foci	1	Taller-than-wide	None	None	None	5
female	62	Solid or almost solid	Hypoechoic	irregular	Punctate echogenic foci	3	Taller-than-wide	None	None	None	5
female	47	Solid or almost solid	very hypoechoic	irregular	Punctate echogenic foci	1	Taller-than-wide	Yes	Yes	None	5
female	60	Solid or almost solid	very hypoechoic	Lobulated	Punctate echogenic foci	1	Taller-than-wide	Yes	Yes	None	5
female	32	Solid or almost solid	very hypoechoic	Smooth	Punctate echogenic foci	1	Taller-than-wide	Yes	None	Yes	5
male	41	Solid or almost solid	very hypoechoic	irregular	Punctate echogenic foci	1	Wider-than-tall	Yes	Yes	None	5
female	41	Solid or almost solid	Hypoechoic	Lobulated	None	1	Taller-than-wide	None	None	None	5
female	41	Solid or almost solid	Hypoechoic	Extra-thyroidal extension	Punctate echogenic foci	1	Taller-than-wide	Yes	Yes	Yes	5
female	49	Solid or almost solid	Hypoechoic	irregular	Punctate echogenic foci	1	Taller-than-wide	None	None	None	5
female	55	Solid or almost solid	Hypoechoic	Extra-thyroidal extension	Punctate echogenic foci	1	Taller-than-wide	None	None	None	5
male	41	Solid or almost solid	Hypoechoic	Lobulated	Punctate echogenic foci	1	Taller-than-wide	Yes	Yes	None	5
female	49	Solid or almost solid	Hypoechoic	Smooth	Punctate echogenic foci	1	Taller-than-wide	None	None	None	5
female	52	Solid or almost solid	Hypoechoic	Extra-thyroidal extension	Punctate echogenic foci	1	Taller-than-wide	None	None	None	5
female	39	Solid or almost solid	Hypoechoic	Lobulated	Punctate echogenic foci	1	Taller-than-wide	Yes	Yes	None	5
female	58	Solid or almost solid	Hypoechoic	Lobulated	Punctate echogenic foci	1	Taller-than-wide	Yes	Yes	None	5
female	41	Solid or almost solid	Hypoechoic	irregular	Punctate echogenic foci	0	Taller-than-wide	Yes	Yes	None	5
male	33	Solid or almost solid	Hypoechoic	Lobulated	None	0	Taller-than-wide	Yes	Yes	None	5
female	46	Solid or almost solid	Hypoechoic	Lobulated	Punctate echogenic foci	0	Taller-than-wide	Yes	Yes	None	5
female	24	Solid or almost solid	Hypoechoic	irregular	Punctate echogenic foci	0	Taller-than-wide	None	None	None	5
female	47	Solid or almost solid	Hypoechoic	irregular	Punctate echogenic foci	1	Wider-than-tall	None	None	None	5
female	52	Solid or almost solid	Hypoechoic	Lobulated	Punctate echogenic foci	1	Taller-than-wide	None	None	None	5
female	38	Solid or almost solid	Hypoechoic	irregular	Punctate echogenic foci	1	Taller-than-wide	None	None	None	5
female	27	Solid or almost solid	Hypoechoic	irregular	Punctate echogenic foci	1	Taller-than-wide	None	None	None	5
female	48	Solid or almost solid	Hypoechoic	Smooth	Punctate echogenic foci	1	Taller-than-wide	None	None	None	5
male	43	Solid or almost solid	Hypoechoic	Extra-thyroidal extension	Punctate echogenic foci	1	Taller-than-wide	Yes	Yes	None	5
female	46	Solid or almost solid	Hypoechoic	irregular	Punctate echogenic foci	1	Taller-than-wide	Yes	Yes	None	5
female	51	Solid or almost solid	Hypoechoic	Lobulated	Punctate echogenic foci	2	Wider-than-tall	Yes	None	Yes	5
female	33	Solid or almost solid	Hypoechoic	irregular	Punctate echogenic foci	2	Taller-than-wide	None	None	None	5
female	39	Solid or almost solid	Hypoechoic	irregular	Punctate echogenic foci	2	Wider-than-tall	None	None	None	5
female	54	Solid or almost solid	Hypoechoic	Lobulated	Punctate echogenic foci	2	Taller-than-wide	None	None	None	5
female	25	Solid or almost solid	Hypoechoic	Smooth	Punctate echogenic foci	2	Taller-than-wide	Yes	Yes	None	5
female	39	Solid or almost solid	Hypoechoic	Lobulated	Punctate echogenic foci	2	Taller-than-wide	Yes	Yes	None	5
female	52	Solid or almost solid	Hypoechoic	irregular	Punctate echogenic foci	2	Taller-than-wide	None	None	None	5
female	26	Solid or almost solid	Hypoechoic	Extra-thyroidal extension	Punctate echogenic foci	2	Wider-than-tall	Yes	Yes	None	5
female	41	Solid or almost solid	Hypoechoic	Extra-thyroidal extension	Macrocalcification	2	Taller-than-wide	None	None	None	5
female	35	Solid or almost solid	Hypoechoic	Lobulated	Punctate echogenic foci	2	Taller-than-wide	None	None	None	5
female	43	Solid or almost solid	Hypoechoic	Lobulated	None	2	Wider-than-tall	Yes	Yes	None	4
female	45	Solid or almost solid	Hypoechoic	irregular	Punctate echogenic foci	3	Taller-than-wide	None	None	None	5
female	34	Solid or almost solid	Hypoechoic	Extra-thyroidal extension	Punctate echogenic foci	2	Wider-than-tall	Yes	Yes	Yes	5
female	51	Solid or almost solid	Hypoechoic	Smooth	peripheral calcification	2	Wider-than-tall	Yes	Yes	None	4
female	55	Solid or almost solid	Hypoechoic	Extra-thyroidal extension	Punctate echogenic foci	2	Wider-than-tall	Yes	Yes	None	5
female	35	Solid or almost solid	Hypoechoic	Smooth	Punctate echogenic foci	0	Taller-than-wide	None	None	None	5
female	30	Solid or almost solid	Hypoechoic	Lobulated	None	0	Wider-than-tall	Yes	Yes	None	4
female	47	Solid or almost solid	Hypoechoic	irregular	Punctate echogenic foci	3	Wider-than-tall	None	None	None	5
female	32	Solid or almost solid	Hypoechoic	Lobulated	Punctate echogenic foci	0	Wider-than-tall	Yes	Yes	Yes	5
female	29	Solid or almost solid	Hypoechoic	Smooth	Punctate echogenic foci	0	Taller-than-wide	Yes	Yes	Yes	5
female	25	Solid or almost solid	Hypoechoic	ill-defined	None	0	Taller-than-wide	Yes	Yes	None	5
female	9	Solid or almost solid	Hypoechoic	irregular	Punctate echogenic foci	0	Taller-than-wide	Yes	Yes	Yes	5
female	41	Solid or almost solid	Hypoechoic	irregular	None	0	Wider-than-tall	Yes	Yes	None	4
female	52	Solid or almost solid	Hypoechoic	ill-defined	Punctate echogenic foci	0	Taller-than-wide	Yes	Yes	None	5
female	48	Solid or almost solid	Hypoechoic	Extra-thyroidal extension	Punctate echogenic foci	0	Taller-than-wide	Yes	Yes	None	5
female	28	Solid or almost solid	very hypoechoic	irregular	Punctate echogenic foci	0	Taller-than-wide	None	None	None	5
female	52	Solid or almost solid	Hypoechoic	Lobulated	None	0	Taller-than-wide	None	None	None	5
female	43	Solid or almost solid	Hypoechoic	irregular	Punctate echogenic foci	0	Wider-than-tall	None	None	None	5
female	32	Solid or almost solid	Hypoechoic	irregular	None	0	Wider-than-tall	None	None	None	4
female	47	Solid or almost solid	Hypoechoic	irregular	None	1	Taller-than-wide	None	None	None	5
female	35	Solid or almost solid	Hypoechoic	Extra-thyroidal extension	Punctate echogenic foci	1	Wider-than-tall	None	None	None	5
female	37	Solid or almost solid	Hypoechoic	Smooth	Punctate echogenic foci	0	Taller-than-wide	Yes	Yes	None	5
female	72	Solid or almost solid	Hypoechoic	Lobulated	Punctate echogenic foci	1	Wider-than-tall	None	None	None	5
female	39	Solid or almost solid	Hypoechoic	ill-defined	peripheral calcification	1	Taller-than-wide	None	None	None	5
female	46	Solid or almost solid	Hypoechoic	Smooth	Punctate echogenic foci	1	Wider-than-tall	Yes	Yes	None	5
female	54	Solid or almost solid	Hypoechoic	Lobulated	Punctate echogenic foci	1	Taller-than-wide	Yes	Yes	None	5
female	42	Solid or almost solid	Hypoechoic	ill-defined	Punctate echogenic foci	1	Wider-than-tall	None	None	None	5
female	41	Solid or almost solid	Hypoechoic	irregular	Macrocalcification	1	Wider-than-tall	Yes	Yes	None	4
male	42	Solid or almost solid	Hypoechoic	irregular	Punctate echogenic foci	1	Wider-than-tall	None	None	None	5
female	54	Solid or almost solid	Hypoechoic	Lobulated	Punctate echogenic foci	1	Taller-than-wide	None	None	None	5
female	56	Solid or almost solid	Hypoechoic	irregular	Punctate echogenic foci	1	Taller-than-wide	None	None	None	5
female	54	Solid or almost solid	Hypoechoic	irregular	None	1	Taller-than-wide	None	None	None	5
female	57	Solid or almost solid	Hypoechoic	Lobulated	None	1	Wider-than-tall	Yes	Yes	None	4
female	29	Solid or almost solid	Hypoechoic	irregular	None	1	Wider-than-tall	Yes	Yes	Yes	5
female	52	Solid or almost solid	Hypoechoic	Lobulated	None	1	Wider-than-tall	Yes	Yes	None	4
female	32	Solid or almost solid	Hypoechoic	Lobulated	Macrocalcification	0	Taller-than-wide	Yes	Yes	None	5
female	40	Solid or almost solid	Hypoechoic	Lobulated	Punctate echogenic foci	1	Taller-than-wide	Yes	Yes	None	5
female	48	Solid or almost solid	Hypoechoic	irregular	Punctate echogenic foci	1	Taller-than-wide	None	None	None	5
female	41	Solid or almost solid	Hypoechoic	Extra-thyroidal extension	None	1	Wider-than-tall	Yes	Yes	Yes	4
female	27	Solid or almost solid	Hypoechoic	Extra-thyroidal extension	Punctate echogenic foci	1	Wider-than-tall	None	None	None	5
female	58	Solid or almost solid	Hypoechoic	irregular	Punctate echogenic foci	1	Taller-than-wide	None	None	None	5
female	51	Solid or almost solid	Hypoechoic	Lobulated	Punctate echogenic foci	1	Wider-than-tall	Yes	Yes	None	5
female	41	Solid or almost solid	Hypoechoic	Lobulated	Punctate echogenic foci	1	Taller-than-wide	None	None	None	5
female	64	Solid or almost solid	Hypoechoic	Smooth	Punctate echogenic foci	1	Wider-than-tall	None	None	None	5
female	47	Solid or almost solid	Hypoechoic	Lobulated	Punctate echogenic foci	1	Wider-than-tall	Yes	Yes	None	5
female	66	Solid or almost solid	Hypoechoic	Extra-thyroidal extension	Punctate echogenic foci	1	Taller-than-wide	None	None	None	5
female	45	Solid or almost solid	Hypoechoic	irregular	Punctate echogenic foci	1	Taller-than-wide	None	None	None	5
male	34	Solid or almost solid	Hypoechoic	Smooth	None	1	Wider-than-tall	None	None	None	4
female	40	Solid or almost solid	Hypoechoic	Smooth	Punctate echogenic foci	3	Taller-than-wide	None	None	None	5
female	38	Mixed cystic and solid	Hyperechoic	Smooth	Punctate echogenic foci	1	Wider-than-tall	Yes	Yes	None	4
female	34	Solid or almost solid	Hypoechoic	Smooth	Punctate echogenic foci	1	Wider-than-tall	Yes	Yes	None	5
male	62	Solid or almost solid	Hypoechoic	Smooth	Punctate echogenic foci	1	Taller-than-wide	Yes	Yes	None	5
female	48	Solid or almost solid	very hypoechoic	irregular	Punctate echogenic foci	1	Taller-than-wide	Yes	None	Yes	5
female	50	Solid or almost solid	Hypoechoic	ill-defined	Punctate echogenic foci	1	Wider-than-tall	None	None	None	5
male	30	Solid or almost solid	very hypoechoic	Smooth	None	0	Wider-than-tall	Yes	Yes	Yes	4
female	44	Solid or almost solid	Hypoechoic	Lobulated	None	1	Wider-than-tall	None	None	None	4
male	51	Solid or almost solid	Hypoechoic	irregular	Punctate echogenic foci	0	Wider-than-tall	None	None	None	5
female	65	Solid or almost solid	Hypoechoic	Extra-thyroidal extension	None	1	Taller-than-wide	None	None	None	5
male	32	Solid or almost solid	Hypoechoic	irregular	Punctate echogenic foci	2	Wider-than-tall	Yes	Yes	Yes	5
female	48	Solid or almost solid	Hypoechoic	Smooth	Macrocalcification	1	Wider-than-tall	None	None	None	4
female	27	Solid or almost solid	Hypoechoic	Extra-thyroidal extension	Punctate echogenic foci	1	Wider-than-tall	Yes	Yes	Yes	5
female	39	Solid or almost solid	Hypoechoic	Smooth	Punctate echogenic foci	1	Wider-than-tall	Yes	None	Yes	5
female	41	Solid or almost solid	Hypoechoic	irregular	Punctate echogenic foci	1	Taller-than-wide	None	None	None	5
male	29	Solid or almost solid	Hypoechoic	Lobulated	Punctate echogenic foci	1	Wider-than-tall	Yes	Yes	None	5
female	31	Solid or almost solid	isoechoic	irregular	Punctate echogenic foci	1	Wider-than-tall	Yes	Yes	None	5
female	47	Solid or almost solid	Hypoechoic	irregular	peripheral calcification	1	Wider-than-tall	None	None	None	4
female	28	Solid or almost solid	Hypoechoic	Smooth	Punctate echogenic foci	1	Wider-than-tall	Yes	Yes	Yes	5
female	40	Solid or almost solid	Hypoechoic	Lobulated	Punctate echogenic foci	0	Wider-than-tall	Yes	Yes	Yes	5
female	46	Solid or almost solid	Hypoechoic	Smooth	None	0	Taller-than-wide	Yes	Yes	None	5
female	37	Solid or almost solid	Hypoechoic	Lobulated	Punctate echogenic foci	0	Taller-than-wide	Yes	None	Yes	5
female	35	Solid or almost solid	very hypoechoic	irregular	Punctate echogenic foci	0	Wider-than-tall	None	None	None	5
male	59	Solid or almost solid	Hypoechoic	Smooth	Punctate echogenic foci	0	Wider-than-tall	None	None	None	5
male	50	Solid or almost solid	Hypoechoic	Extra-thyroidal extension	Punctate echogenic foci	0	Taller-than-wide	Yes	Yes	None	5
female	45	Solid or almost solid	Hypoechoic	Smooth	Punctate echogenic foci	2	Taller-than-wide	None	None	None	5
female	42	Solid or almost solid	Hypoechoic	irregular	Punctate echogenic foci	0	Taller-than-wide	Yes	Yes	Yes	5
male	25	Solid or almost solid	Hypoechoic	Lobulated	Punctate echogenic foci	0	Taller-than-wide	Yes	Yes	Yes	5
female	50	Solid or almost solid	Hypoechoic	ill-defined	None	0	Taller-than-wide	None	None	None	5
female	44	Solid or almost solid	Hypoechoic	Smooth	Punctate echogenic foci	3	Taller-than-wide	None	None	None	5
female	57	Solid or almost solid	Hypoechoic	Smooth	Punctate echogenic foci	0	Wider-than-tall	None	None	None	5
female	67	Solid or almost solid	Hypoechoic	irregular	None	0	Wider-than-tall	None	None	None	4
female	59	Solid or almost solid	Hypoechoic	Smooth	Punctate echogenic foci	0	Taller-than-wide	Yes	Yes	None	5
female	52	Solid or almost solid	Hypoechoic	irregular	None	0	Taller-than-wide	None	None	None	5
female	35	Solid or almost solid	Hypoechoic	Lobulated	Punctate echogenic foci	2	Taller-than-wide	None	None	None	5
female	32	Solid or almost solid	Hypoechoic	Smooth	Punctate echogenic foci	0	Taller-than-wide	None	None	None	5
female	35	Solid or almost solid	very hypoechoic	irregular	None	0	Wider-than-tall	None	None	None	4
female	51	Solid or almost solid	Hypoechoic	irregular	None	0	Taller-than-wide	None	None	None	5
female	50	Solid or almost solid	Hypoechoic	Smooth	Punctate echogenic foci	0	Wider-than-tall	None	None	None	5
female	34	Solid or almost solid	Hypoechoic	ill-defined	Punctate echogenic foci	0	Taller-than-wide	None	None	None	5
female	45	Solid or almost solid	Hypoechoic	ill-defined	Punctate echogenic foci	2	Wider-than-tall	None	None	None	5
female	42	Solid or almost solid	Hypoechoic	Lobulated	Punctate echogenic foci	0	Wider-than-tall	None	None	None	5
female	52	Solid or almost solid	Hypoechoic	Extra-thyroidal extension	Punctate echogenic foci	0	Taller-than-wide	Yes	Yes	None	5
female	67	Solid or almost solid	Hypoechoic	irregular	Punctate echogenic foci	0	Taller-than-wide	None	None	None	5
female	26	Solid or almost solid	Hypoechoic	Lobulated	None	2	Wider-than-tall	None	None	None	5
female	60	Solid or almost solid	Hypoechoic	irregular	None	3	Taller-than-wide	None	None	None	5
female	32	Solid or almost solid	Hypoechoic	irregular	Punctate echogenic foci	0	Wider-than-tall	Yes	Yes	Yes	5
female	33	Solid or almost solid	Hypoechoic	Lobulated	Punctate echogenic foci	0	Wider-than-tall	Yes	Yes	Yes	5
female	56	Solid or almost solid	Hypoechoic	Extra-thyroidal extension	Punctate echogenic foci	0	Wider-than-tall	Yes	Yes	Yes	5
female	57	Solid or almost solid	Hypoechoic	irregular	Macrocalcification	0	Wider-than-tall	None	None	None	4
male	37	Solid or almost solid	Hypoechoic	Lobulated	Punctate echogenic foci	0	Wider-than-tall	Yes	Yes	None	5
female	42	Solid or almost solid	Hypoechoic	Extra-thyroidal extension	Punctate echogenic foci	0	Wider-than-tall	None	None	None	5
female	54	Solid or almost solid	Hypoechoic	irregular	None	0	Wider-than-tall	None	None	None	4
female	45	Solid or almost solid	Hypoechoic	ill-defined	Punctate echogenic foci	0	Wider-than-tall	None	None	None	5
female	51	Solid or almost solid	Hypoechoic	Smooth	None	0	Taller-than-wide	None	None	None	5
female	33	Solid or almost solid	Hypoechoic	Smooth	Punctate echogenic foci	0	Wider-than-tall	None	None	None	5
female	45	Solid or almost solid	Hypoechoic	Smooth	Punctate echogenic foci	2	Taller-than-wide	Yes	Yes	None	5
female	66	Solid or almost solid	Hypoechoic	Smooth	Macrocalcification	0	Taller-than-wide	None	None	None	5
male	69	Solid or almost solid	Hypoechoic	Smooth	peripheral calcification	0	Taller-than-wide	None	None	None	5
female	63	Solid or almost solid	Hypoechoic	ill-defined	None	0	Taller-than-wide	None	None	None	5
female	57	Solid or almost solid	Hypoechoic	Smooth	Punctate echogenic foci	0	Wider-than-tall	None	None	None	5
female	29	Solid or almost solid	Hypoechoic	Smooth	Punctate echogenic foci	0	Wider-than-tall	None	None	None	5
female	39	Solid or almost solid	Hypoechoic	Lobulated	Punctate echogenic foci	0	Wider-than-tall	Yes	Yes	None	5
female	57	Solid or almost solid	Hypoechoic	Lobulated	Punctate echogenic foci	0	Taller-than-wide	None	None	None	5
female	51	Solid or almost solid	Hypoechoic	irregular	Punctate echogenic foci	0	Wider-than-tall	Yes	Yes	Yes	5
female	47	Solid or almost solid	Hypoechoic	Smooth	Punctate echogenic foci	0	Wider-than-tall	Yes	Yes	None	5
female	29	Solid or almost solid	Hypoechoic	Smooth	None	2	Wider-than-tall	Yes	Yes	None	4
female	33	Solid or almost solid	very hypoechoic	Smooth	Punctate echogenic foci	0	Wider-than-tall	None	None	None	5
female	37	Mixed cystic and solid	Hypoechoic	Smooth	Punctate echogenic foci	0	Wider-than-tall	Yes	Yes	None	4
female	41	Solid or almost solid	very hypoechoic	Smooth	Punctate echogenic foci	0	Taller-than-wide	None	None	None	5
female	43	Solid or almost solid	Hypoechoic	irregular	None	2	Taller-than-wide	None	None	None	5
female	48	Solid or almost solid	Hypoechoic	irregular	None	2	Wider-than-tall	None	None	None	4
male	52	Solid or almost solid	Hypoechoic	Smooth	Punctate echogenic foci	2	Wider-than-tall	Yes	Yes	None	5
female	38	Solid or almost solid	Hypoechoic	Lobulated	Punctate echogenic foci	2	Wider-than-tall	Yes	Yes	None	5
female	25	Solid or almost solid	Hypoechoic	irregular	Punctate echogenic foci	2	Wider-than-tall	None	None	None	5
female	58	Solid or almost solid	Hypoechoic	Smooth	None	2	Taller-than-wide	None	None	None	5
female	53	Solid or almost solid	Hypoechoic	Extra-thyroidal extension	None	2	Wider-than-tall	Yes	Yes	None	4
female	57	Solid or almost solid	Hypoechoic	Lobulated	Macrocalcification	2	Wider-than-tall	None	None	None	4
male	25	Solid or almost solid	Hypoechoic	Smooth	None	2	Wider-than-tall	Yes	Yes	None	4
female	64	Solid or almost solid	Hypoechoic	irregular	Punctate echogenic foci	3	Wider-than-tall	None	None	None	5
female	55	Solid or almost solid	Hypoechoic	Smooth	Punctate echogenic foci	2	Wider-than-tall	None	None	None	5
female	39	Solid or almost solid	Hypoechoic	Extra-thyroidal extension	Punctate echogenic foci	2	Taller-than-wide	Yes	Yes	None	5
female	38	Solid or almost solid	Hypoechoic	Smooth	Punctate echogenic foci	2	Wider-than-tall	Yes	Yes	Yes	5
female	51	Solid or almost solid	Hypoechoic	Lobulated	None	2	Taller-than-wide	None	None	None	5
female	71	Solid or almost solid	Hyperechoic	Smooth	Punctate echogenic foci	2	Wider-than-tall	None	None	None	4
female	37	Solid or almost solid	Hypoechoic	Smooth	Punctate echogenic foci	2	Wider-than-tall	None	None	None	5
female	42	Solid or almost solid	Hypoechoic	irregular	None	2	Taller-than-wide	None	None	None	5
female	56	Solid or almost solid	Hypoechoic	Smooth	Punctate echogenic foci	0	Taller-than-wide	Yes	Yes	None	5
female	64	Mixed cystic and solid	Hypoechoic	Extra-thyroidal extension	Punctate echogenic foci	0	Wider-than-tall	None	None	None	5
female	30	Solid or almost solid	Hypoechoic	Lobulated	Punctate echogenic foci	0	Wider-than-tall	Yes	Yes	None	5
female	37	Solid or almost solid	Hypoechoic	Lobulated	Punctate echogenic foci	0	Wider-than-tall	Yes	Yes	None	5
female	39	Solid or almost solid	Hypoechoic	irregular	None	0	Wider-than-tall	None	None	None	4
female	32	Solid or almost solid	Hypoechoic	Lobulated	Punctate echogenic foci	0	Taller-than-wide	None	None	None	5
female	48	Solid or almost solid	Hypoechoic	irregular	Macrocalcification	0	Taller-than-wide	None	None	None	5
female	50	Solid or almost solid	Hypoechoic	irregular	Punctate echogenic foci	0	Wider-than-tall	None	None	None	5
female	27	Solid or almost solid	Hypoechoic	Smooth	Punctate echogenic foci	0	Wider-than-tall	None	None	None	5
female	48	Solid or almost solid	Hypoechoic	ill-defined	Punctate echogenic foci	2	Wider-than-tall	None	None	None	5
female	33	Solid or almost solid	Hypoechoic	irregular	Punctate echogenic foci	0	Wider-than-tall	Yes	Yes	None	5
female	62	Solid or almost solid	Hypoechoic	Lobulated	Punctate echogenic foci	0	Taller-than-wide	None	None	None	5
female	61	Solid or almost solid	Hypoechoic	Smooth	peripheral calcification	0	Taller-than-wide	None	None	None	5
female	28	Solid or almost solid	very hypoechoic	irregular	None	0	Wider-than-tall	None	None	None	4
male	57	Solid or almost solid	Hypoechoic	Smooth	None	0	Wider-than-tall	Yes	Yes	Yes	4
female	48	Solid or almost solid	Hypoechoic	irregular	Punctate echogenic foci	2	Taller-than-wide	None	None	None	5
female	58	Solid or almost solid	Hypoechoic	Smooth	Punctate echogenic foci	0	Wider-than-tall	None	None	None	5
female	48	Solid or almost solid	Hypoechoic	Lobulated	None	0	Wider-than-tall	None	None	None	4
female	68	Solid or almost solid	Hypoechoic	Lobulated	None	0	Wider-than-tall	None	None	None	4
male	36	Solid or almost solid	Hypoechoic	irregular	Punctate echogenic foci	0	Taller-than-wide	Yes	Yes	None	5
female	50	Solid or almost solid	Hypoechoic	Smooth	Punctate echogenic foci	0	Wider-than-tall	Yes	Yes	Yes	5
female	50	Solid or almost solid	Hypoechoic	ill-defined	None	0	Wider-than-tall	Yes	Yes	None	4
female	71	Solid or almost solid	Hypoechoic	Smooth	Punctate echogenic foci	0	Wider-than-tall	None	None	None	5
female	62	Solid or almost solid	Hypoechoic	Lobulated	Punctate echogenic foci	0	Wider-than-tall	Yes	Yes	Yes	5
male	34	Solid or almost solid	very hypoechoic	Extra-thyroidal extension	Punctate echogenic foci	2	Wider-than-tall	Yes	Yes	Yes	5
female	65	Solid or almost solid	Hyperechoic	Smooth	Punctate echogenic foci	0	Wider-than-tall	None	None	None	4
male	54	Solid or almost solid	very hypoechoic	ill-defined	Punctate echogenic foci	0	Taller-than-wide	None	None	None	5
female	83	Solid or almost solid	Hypoechoic	Smooth	Punctate echogenic foci	0	Taller-than-wide	Yes	Yes	None	5
male	49	Solid or almost solid	Hypoechoic	irregular	None	0	Taller-than-wide	None	None	None	5
female	46	Mixed cystic and solid	isoechoic	irregular	Macrocalcification	0	Wider-than-tall	None	None	None	4
